# Supplementary material for: PU.1 promotes development of rheumatoid arthritis via repressing FLT3 in macrophages and fibroblast-like synoviocytes
Source: HighWire-hosted journal article supplement (doi:10.1136/ard-2022-222708), 2022-10-05
Supplement: ard-2022-222708supp001_data_supplement.pdf [file ard-2022-222708supp001_data_supplement.pdf]

# Supplementary information

Supplementary figure S1: The genotyping results of UREAΔ mice.

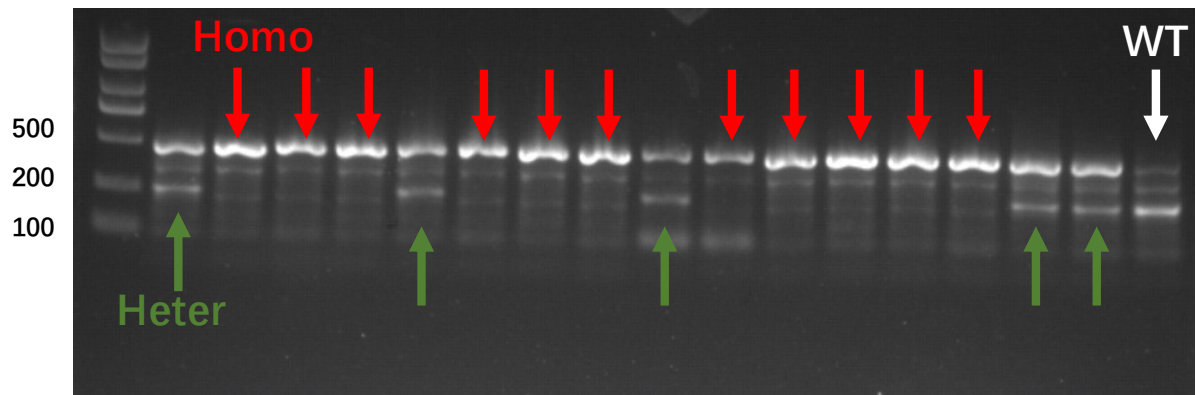

Mutant=450bp  
Heter=205bp and 450bp  
WT=205bp

Supplementary figure S2: The body weight change of WT and UREA mice during establishment of CAIA model.

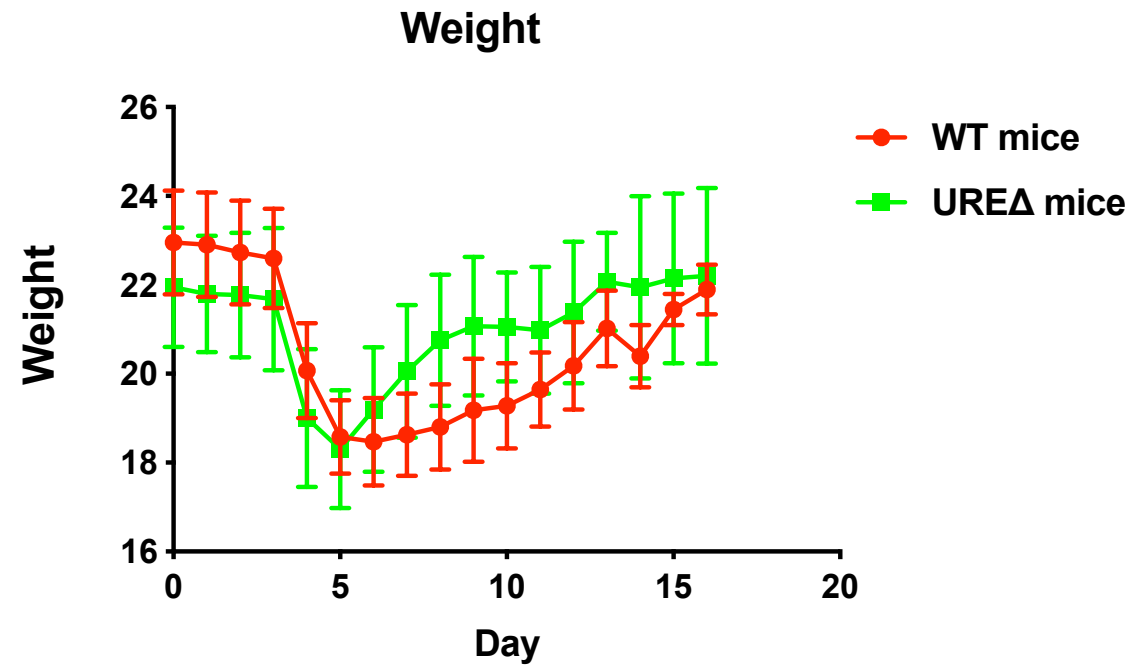

Supplementary figure S3: The heatmap of RNA-seq in PBMC from WT CAIA and UREΔ CAIA mice.

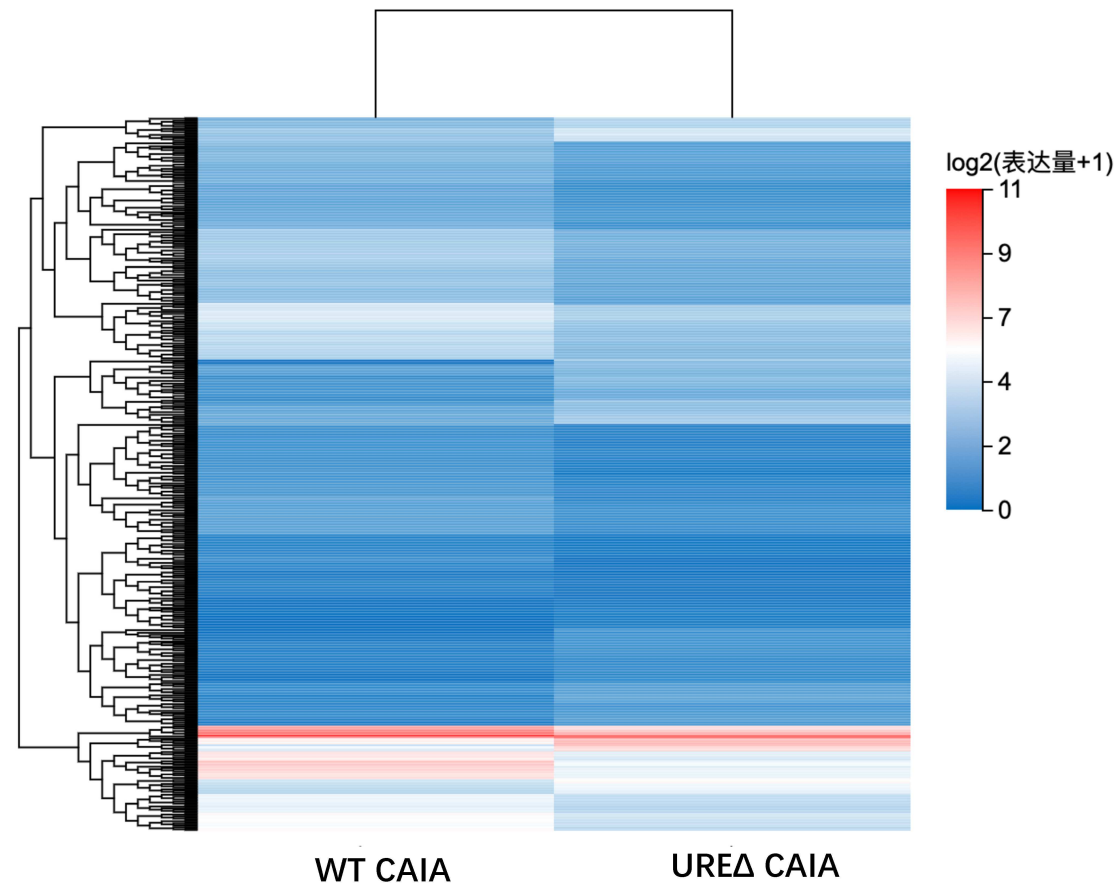

Supplementary figure S4: The percentage of F4/80<sup>+</sup>CD11b<sup>+</sup> peritoneal macrophage from CAIA model.

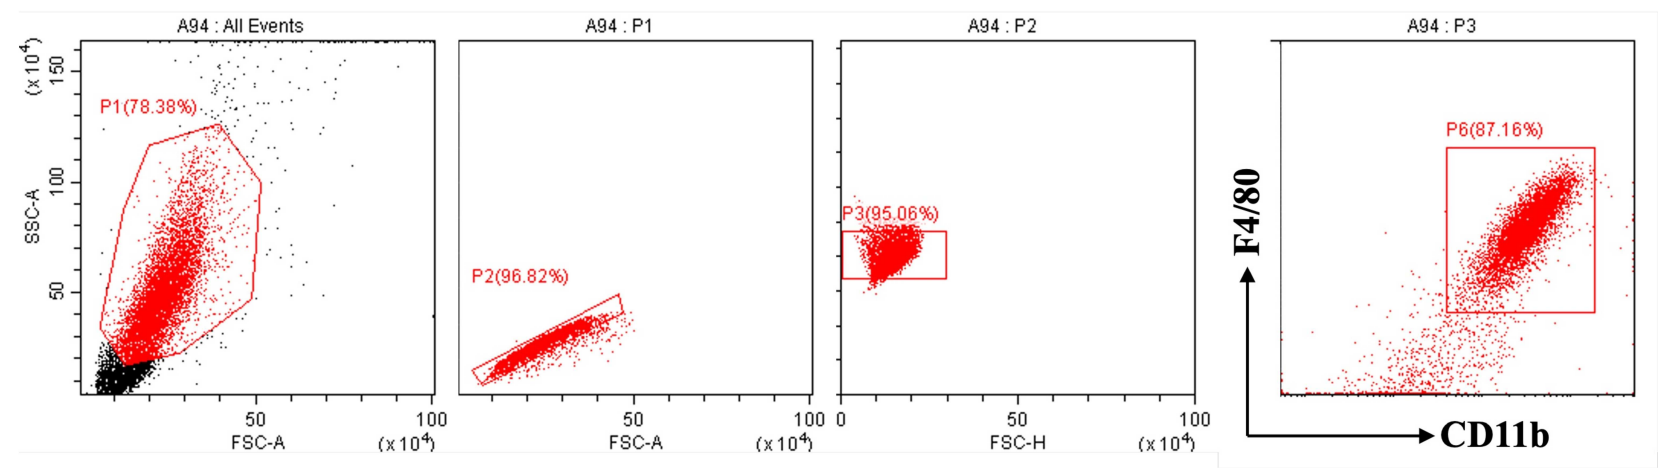

Supplementary figure S5: The genotyping results of FLT3-ITD mice

Mutant = ~500 bp  
Heterozygote = 163 bp and ~500 bp  
Wild type = 163 bp

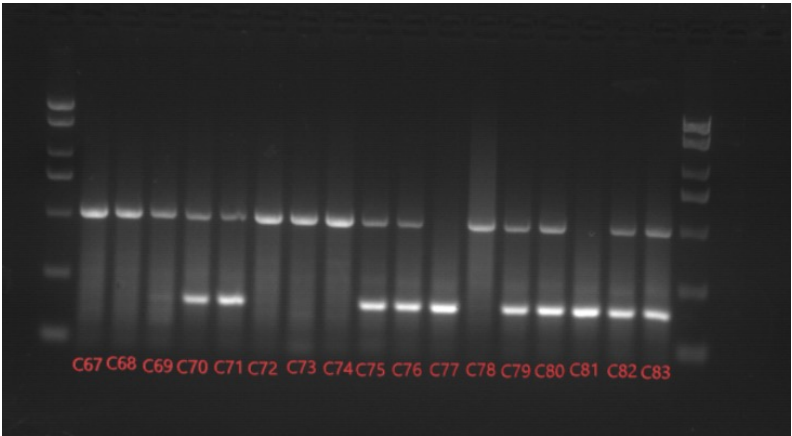

| C67    | C68    | C69   | C70   | C71   | C72    | C73    | C74    | C75   | C76   | C77 | C78    | C79   | C80   | C81 | C82   | C83   |
|--------|--------|-------|-------|-------|--------|--------|--------|-------|-------|-----|--------|-------|-------|-----|-------|-------|
| mutant | mutant | heter | heter | heter | mutant | mutant | mutant | heter | heter | WT  | mutant | heter | heter | WT  | heter | heter |

Supplementary figure S6: The body weight change of WT and FLT3-ITD mice during establishment of CAIA model.

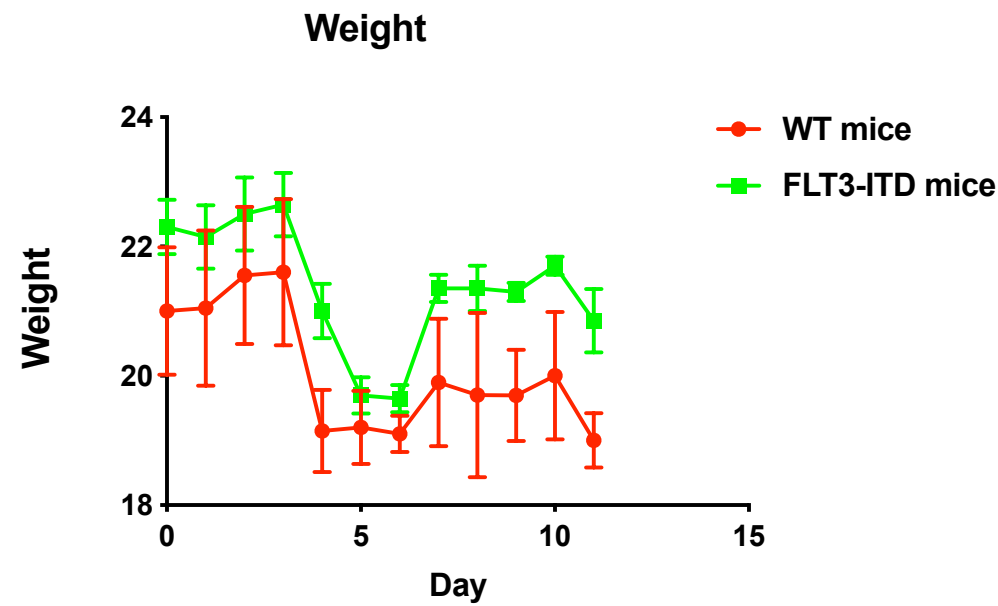

Supplementary figure S7: The knockdown efficiency of PU.1 siRNA.

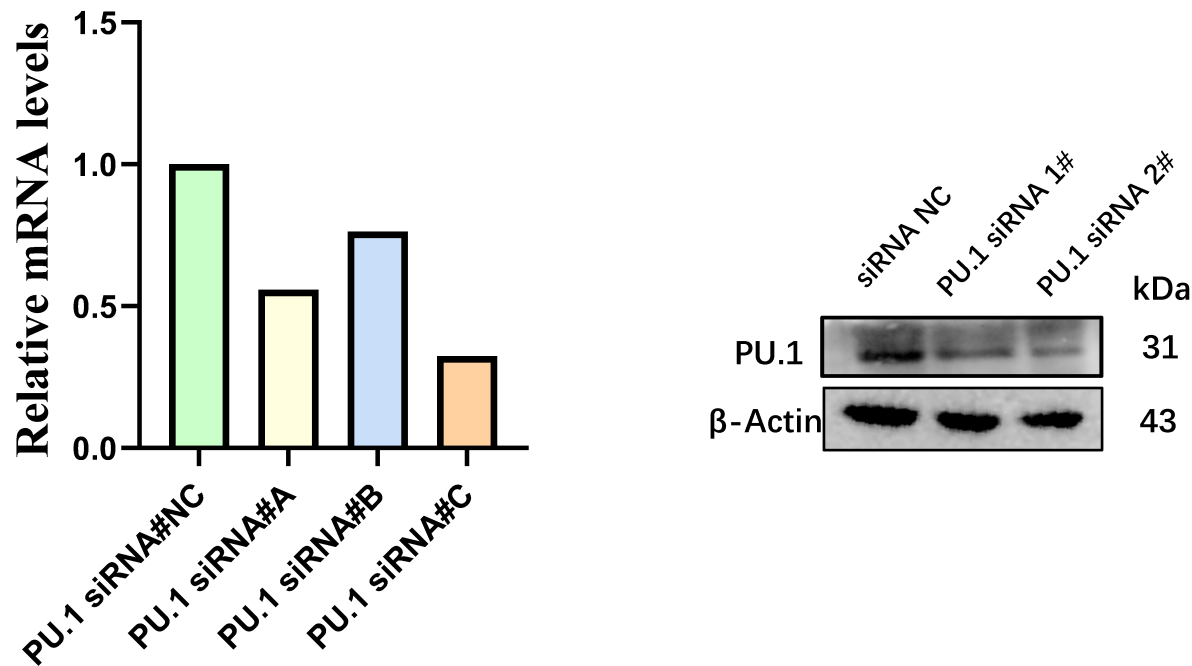



Supplementary figure S8: The heatmap of RNA-seq in RA-FLS (NC group) and RA-FLS (PU.1 KD group).

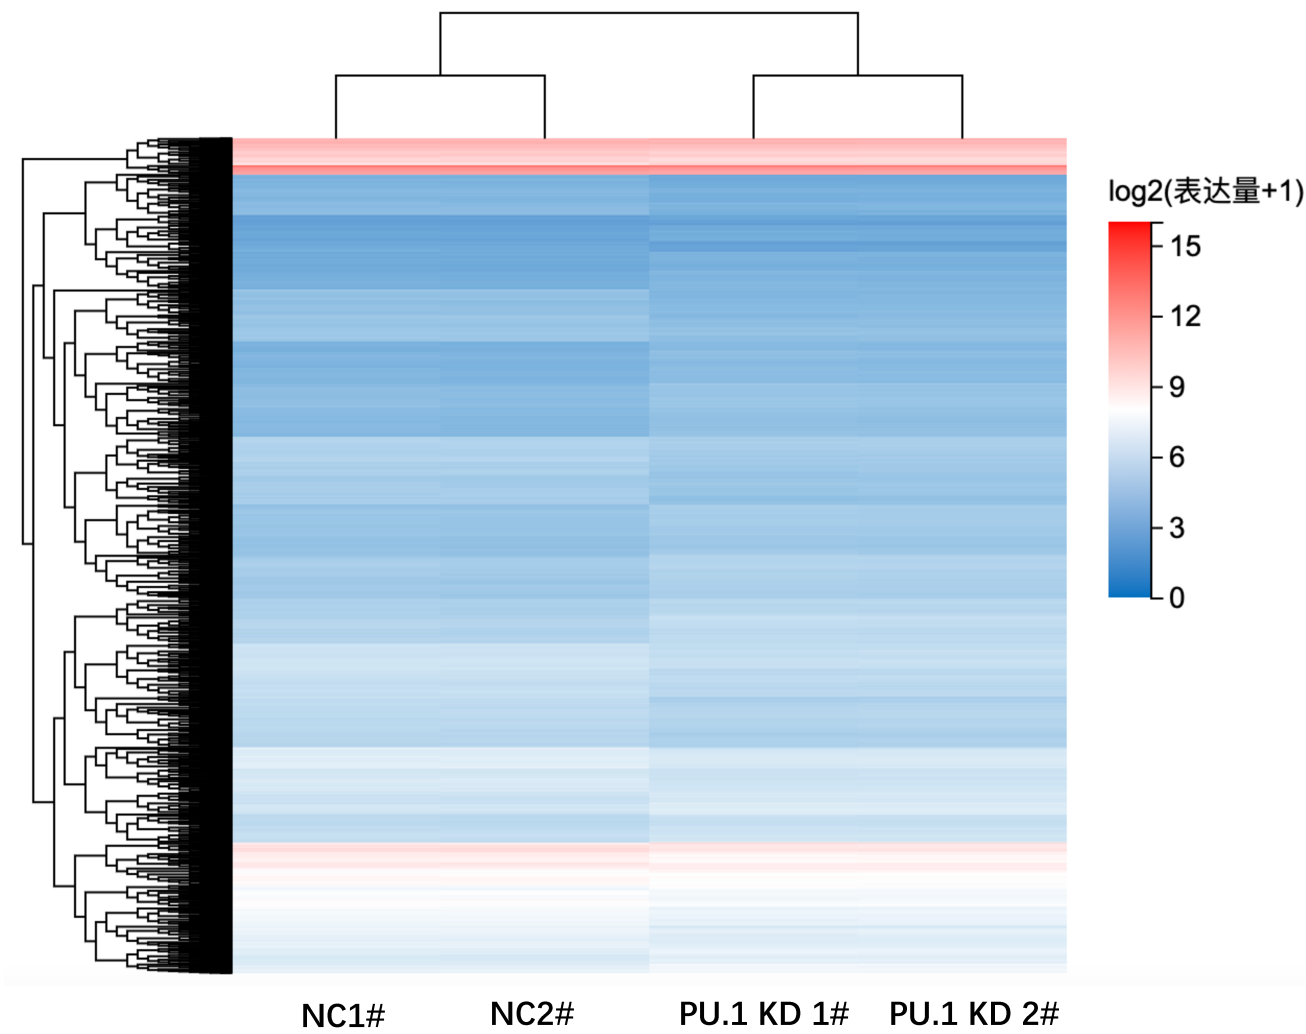

Supplementary figure S9: The knockdown efficiency of PU.1 and FLT3 siRNAs.

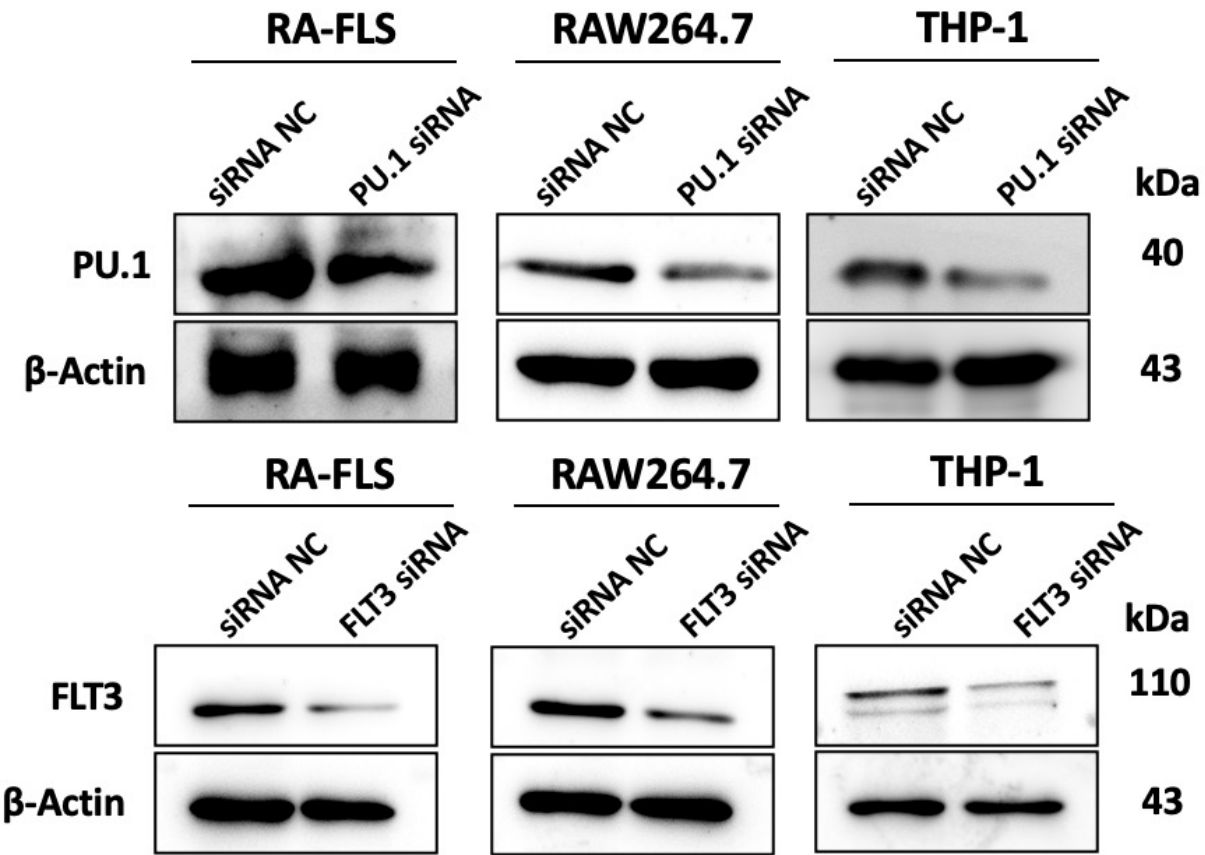

Supplementary figure S10: PMA-induced differentiation efficiency of THP-1-M.

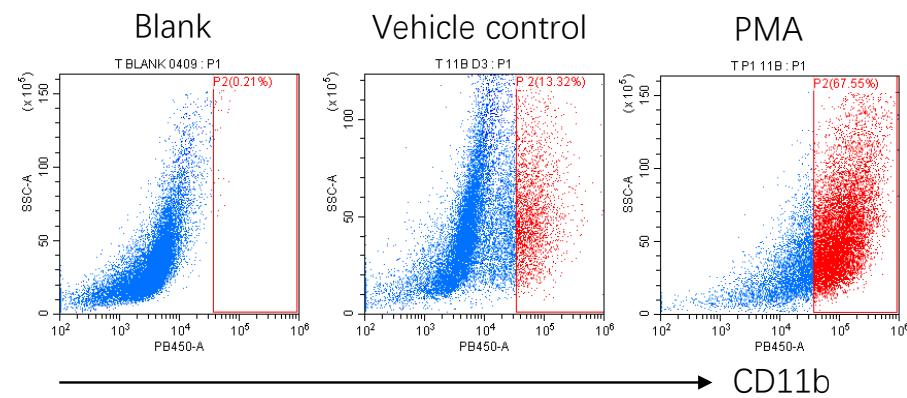

Supplementary figure S11: The body weight change of DBA mice during establishment of CAIA model (control and DB2313 group).

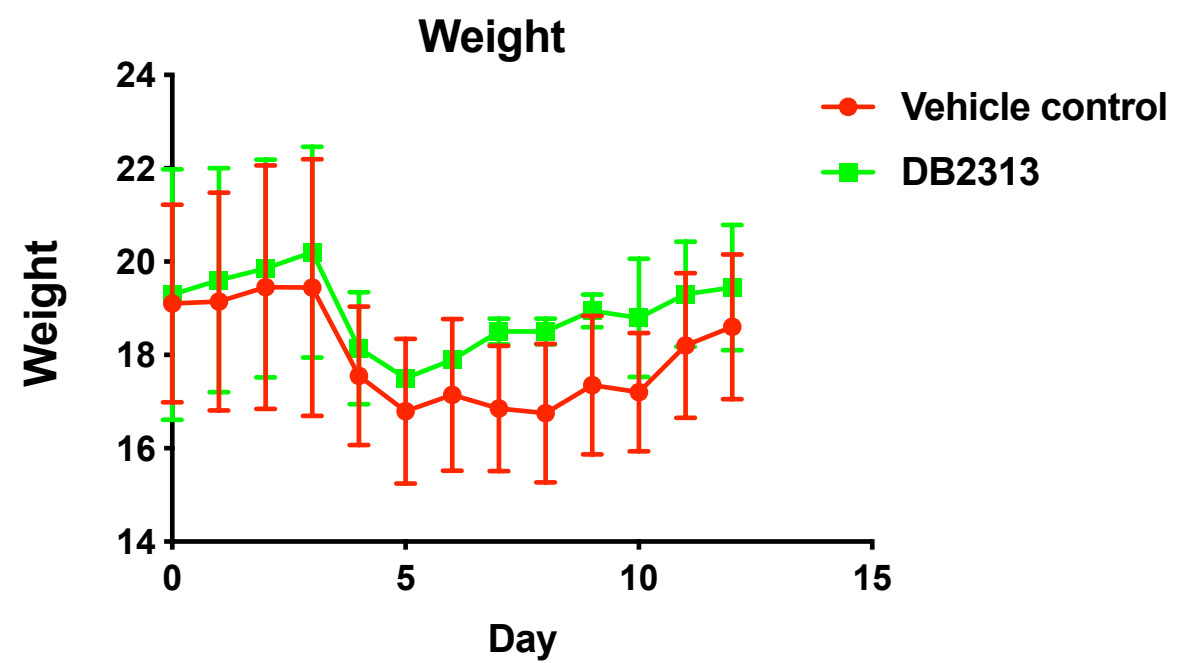

Supplementary figure S12: The body weight change of DBA mice during establishment of CIA model (control and DB2313 group).

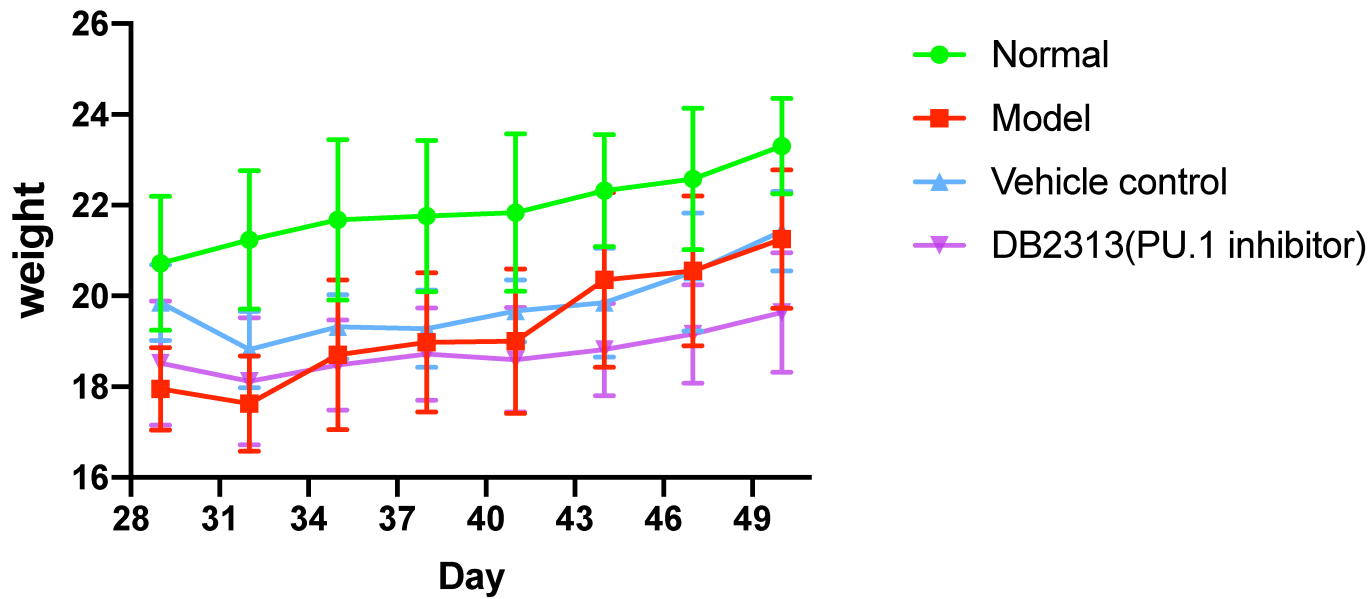

Supplementary figure S13: The body weight change of DBA mice during establishment of CIA model (control and DB2313 group).

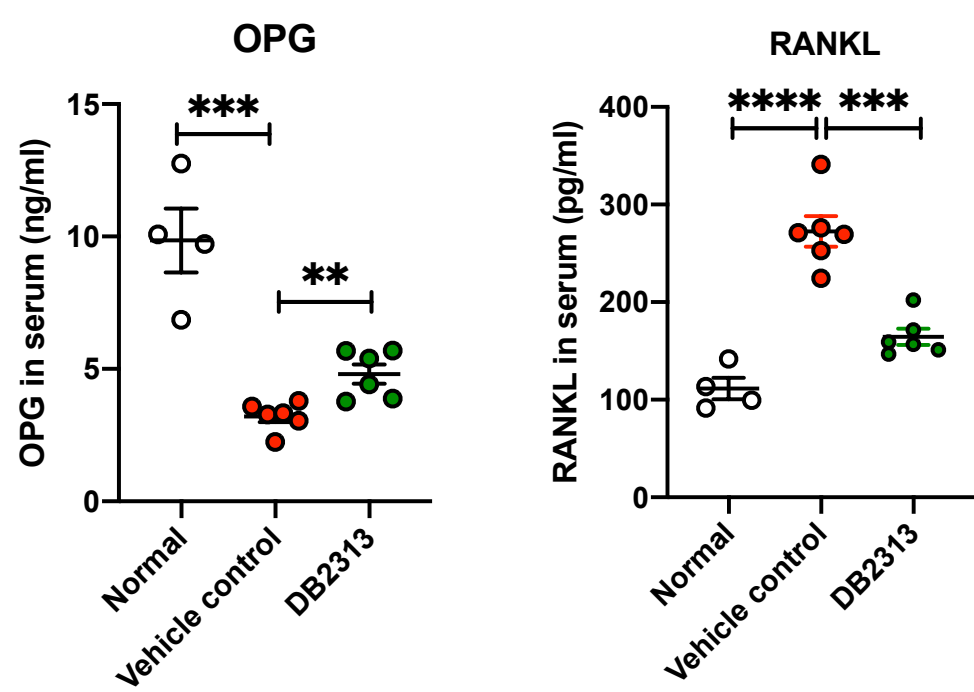

Supplementary Table S1: The clinical information of normal control, OA and RA patients

|                                      | Section                    | admission No. | file No.                  | start date | leave date | Inpatient day | bed No. | Age | Gender | Tel         |
|--------------------------------------|----------------------------|---------------|---------------------------|------------|------------|---------------|---------|-----|--------|-------------|
| RA patients 1#                       | Department of Orthopaedics | 17170075      | 1907-骨5东关节*114-00001      | 2019-06-21 | 2019-07-01 | 10            | 0024    | 67  | Male   | 13965020625 |
| RA patients 2#                       | Department of Orthopaedics | 17170850      | 1907-骨5东关节*114-00002      | 2019-06-23 | 2019-07-05 | 12            | 0017    | 52  | Female | 15956073840 |
| RA patients 3#                       | Department of Orthopaedics | 17179074      | 1907-骨5东关节*114-00004      | 2019-07-10 | 2019-07-30 | 20            | 0028    | 30  | Male   | 18056025717 |
| RA patients 4#                       | Department of Orthopaedics | 17206794      | 1909-骨5东关节*114-00005      | 2019-09-15 | 2019-09-27 | 12            | 0012    | 55  | Female | 18555398778 |
| OA patients 1#                       | Department of Orthopaedics | 17175702      | 1912-骨5东关节*115-00025      | 2019-11-25 | 2019-12-12 | 17            | 0033    | 65  | Male   | 18455169736 |
| OA patients 2#                       | Department of Orthopaedics | 17236414      | 1912-骨5东关节*115-00027      | 2019-11-28 | 2019-12-13 | 15            | 0032    | 62  | Female | 15212571656 |
| OA patients 3#                       | Department of Orthopaedics | 17235509      | 1912-骨5东关节*115-00026      | 2019-11-26 | 2019-12-13 | 17            | 0007    | 70  | Male   | 15055905756 |
| OA patients 4#                       | Department of Orthopaedics | 17160934      | 1906-骨5东关节*115-00004      | 2019-06-03 | 2019-06-14 | 11            | 0006    | 62  | Female | 13866119707 |
| Normal control 1#(femoral fracture)  | Department of Orthopaedics | 2018074232    | 2018骨7东老1E*163*1808-00005 | 20180825   | 20180826   | 1             | 112     | 63  | Male   | 13399696235 |
| Normal control 2#(patellar fracture) | Department of Orthopaedics | 2018018337    | 2018骨7东老1E*161*1803-00034 | 20180308   | 20180308   | 1             | 30      | 64  | Male   | 18856428271 |
